# Supplementary material for: Whole-genome sequencing of Burkholderia pseudomallei from an urban melioidosis hot spot reveals a fine-scale population structure and localised spatial clustering in the environment
Source: PubMed Central journal article supplement (PMC7096523; doi:10.1038/s41598-020-62300-8), 2020-03-25
Supplement: 41598_2020_62300_MOESM1_ESM.pdf [file 41598_2020_62300_MOESM1_ESM.pdf]

**Whole-genome sequencing of *Burkholderia pseudomallei* from an urban melioidosis hot-spot reveals a fine-scale population structure and localised spatial clustering in the environment**

Audrey Rachlin, Mark Mayo, Jessica R. Webb, Mariana Kleinecke, Vanessa Rigas, Glenda Harrington, Bart J. Currie, and Mirjam Kaestli

**Supplementary Data**

**Supplementary Table S1-** MLST genotypes identified amongst the 135 *B. pseudomallei*

isolates and numbers detected based on sample type. Asterisks denote novel STs identified as part of the survey.

| ST  | n (soil) | n (water) | Total |
|-----|----------|-----------|-------|
| 36  | 40       | 2         | 42    |
| 109 | 15       | 7         | 22    |
| 131 | 0        | 2         | 2     |
| 132 | 2        | 0         | 2     |
| 144 | 3        | 1         | 4     |
| 279 | 3        | 0         | 3     |
| 320 | 3        | 1         | 4     |
| 326 | 3        | 0         | 3     |
| 327 | 9        | 2         | 11    |
| 335 | 1        | 0         | 1     |
| 362 | 1        | 0         | 1     |
| 456 | 0        | 2         | 2     |
| 462 | 2        | 0         | 2     |
| 464 | 1        | 0         | 1     |
| 466 | 2        | 0         | 2     |

|              |   |   |   |
|--------------|---|---|---|
| <b>472</b>   | 0 | 1 | 1 |
| <b>553</b>   | 7 | 1 | 8 |
| <b>561</b>   | 1 | 0 | 1 |
| <b>562</b>   | 2 | 0 | 2 |
| <b>566</b>   | 2 | 0 | 2 |
| <b>616</b>   | 1 | 1 | 2 |
| <b>639</b>   | 1 | 0 | 1 |
| <b>801</b>   | 2 | 0 | 2 |
| <b>809</b>   | 1 | 0 | 1 |
| <b>813</b>   | 2 | 0 | 2 |
| <b>982</b>   | 2 | 0 | 2 |
| <b>984</b>   | 1 | 0 | 1 |
| <b>1654*</b> | 0 | 1 | 1 |
| <b>1655*</b> | 1 | 0 | 1 |
| <b>1656*</b> | 1 | 0 | 1 |
| <b>1658*</b> | 1 | 0 | 1 |
| <b>1659*</b> | 1 | 0 | 1 |
| <b>1660*</b> | 1 | 0 | 1 |
| <b>1704*</b> | 1 | 0 | 1 |
| <b>1705*</b> | 1 | 0 | 1 |

**Supplementary Table S2-** Summary of 137 *Burkholderia pseudomallei* genomes used to

construct the MP and ML phylogenetic trees.

| Sample ID | Species                          | Year | Site type | Sample source | ST   | BAPS cluster | GenBank/SRA accession no. | Reference                                                |
|-----------|----------------------------------|------|-----------|---------------|------|--------------|---------------------------|----------------------------------------------------------|
| MSHR0668  | <i>Burkholderia pseudomallei</i> | 1998 | N/A       | Human         | 129  | 1            | NC_009074,<br>NC_009075   | Johnson et al.,<br>Genome Announc<br>2015 3(2):e00159-15 |
| MSHR1153  | <i>Burkholderia pseudomallei</i> | 2001 | N/A       | Human         | 117  | 1            | CP009271,<br>CP009272     | Johnson et al.,<br>Genome Announc<br>2015 3(2):e00159-15 |
| MSHR9671  | <i>Burkholderia pseudomallei</i> | 2016 | Drain     | Water         | 456  | 1            | SAMN12824487              | This study                                               |
| MSHR9675  | <i>Burkholderia pseudomallei</i> | 2016 | Drain     | Water         | 109  | 4            | SAMN12824488              | This study                                               |
| MSHR9683  | <i>Burkholderia pseudomallei</i> | 2016 | Drain     | Water         | 109  | 4            | SAMN12824489              | This study                                               |
| MSHR10100 | <i>Burkholderia pseudomallei</i> | 2017 | Drain     | Water         | 472  | 1            | SAMN12824490              | This study                                               |
| MSHR10105 | <i>Burkholderia pseudomallei</i> | 2017 | Drain     | Water         | 616  | 1            | SAMN12824491              | This study                                               |
| MSHR10107 | <i>Burkholderia pseudomallei</i> | 2017 | Drain     | Water         | 456  | 1            | SAMN12824492              | This study                                               |
| MSHR10117 | <i>Burkholderia pseudomallei</i> | 2017 | Drain     | Water         | 327  | 2            | SAMN12824493              | This study                                               |
| MSHR10120 | <i>Burkholderia pseudomallei</i> | 2017 | Drain     | Water         | 36   | 3            | SAMN12824494              | This study                                               |
| MSHR10156 | <i>Burkholderia pseudomallei</i> | 2017 | Drain     | Water         | 109  | 4            | SAMN12824495              | This study                                               |
| MSHR10166 | <i>Burkholderia pseudomallei</i> | 2017 | Drain     | Water         | 320  | 1            | SAMN12824496              | This study                                               |
| MSHR10167 | <i>Burkholderia pseudomallei</i> | 2017 | Drain     | Water         | 131  | 1            | SAMN12824497              | This study                                               |
| MSHR10173 | <i>Burkholderia pseudomallei</i> | 2017 | Drain     | Water         | 131  | 1            | SAMN12824498              | This study                                               |
| MSHR10203 | <i>Burkholderia pseudomallei</i> | 2017 | Drain     | Water         | 109  | 4            | SAMN12824499              | This study                                               |
| MSHR10208 | <i>Burkholderia pseudomallei</i> | 2017 | Drain     | Water         | 109  | 4            | SAMN12824500              | This study                                               |
| MSHR10210 | <i>Burkholderia pseudomallei</i> | 2017 | Drain     | Water         | 109  | 4            | SAMN12824501              | This study                                               |
| MSHR10218 | <i>Burkholderia pseudomallei</i> | 2017 | Drain     | Water         | 327  | 2            | SAMN12824502              | This study                                               |
| MSHR10231 | <i>Burkholderia pseudomallei</i> | 2017 | Drain     | Water         | 36   | 3            | SAMN12824503              | This study                                               |
| MSHR10246 | <i>Burkholderia pseudomallei</i> | 2017 | Drain     | Water         | 144  | 2            | SAMN12824504              | This study                                               |
| MSHR10250 | <i>Burkholderia pseudomallei</i> | 2017 | Drain     | Water         | 109  | 4            | SAMN12824505              | This study                                               |
| MSHR10259 | <i>Burkholderia pseudomallei</i> | 2017 | Drain     | Water         | 1654 | 1            | SAMN12824506              | This study                                               |
| MSHR10269 | <i>Burkholderia pseudomallei</i> | 2017 | Drain     | Water         | 553  | 5            | SAMN12824507              | This study                                               |

|           |                                  |      |       |      |      |   |              |            |
|-----------|----------------------------------|------|-------|------|------|---|--------------|------------|
| MSHR10326 | <i>Burkholderia pseudomallei</i> | 2017 | Park  | Soil | 36   | 3 | SAMN12824508 | This study |
| MSHR10339 | <i>Burkholderia pseudomallei</i> | 2017 | Park  | Soil | 36   | 3 | SAMN12824509 | This study |
| MSHR10344 | <i>Burkholderia pseudomallei</i> | 2017 | Park  | Soil | 36   | 3 | SAMN12824510 | This study |
| MSHR10352 | <i>Burkholderia pseudomallei</i> | 2017 | Park  | Soil | 109  | 4 | SAMN12824511 | This study |
| MSHR10355 | <i>Burkholderia pseudomallei</i> | 2017 | Park  | Soil | 1656 | 3 | SAMN12824512 | This study |
| MSHR10358 | <i>Burkholderia pseudomallei</i> | 2017 | Park  | Soil | 132  | 1 | SAMN12824513 | This study |
| MSHR10405 | <i>Burkholderia pseudomallei</i> | 2017 | Park  | Soil | 36   | 3 | SAMN12824514 | This study |
| MSHR10408 | <i>Burkholderia pseudomallei</i> | 2017 | Park  | Soil | 327  | 2 | SAMN12824515 | This study |
| MSHR10420 | <i>Burkholderia pseudomallei</i> | 2017 | Park  | Soil | 326  | 2 | SAMN12824516 | This study |
| MSHR10428 | <i>Burkholderia pseudomallei</i> | 2017 | Park  | Soil | 326  | 2 | SAMN12824517 | This study |
| MSHR10433 | <i>Burkholderia pseudomallei</i> | 2017 | Park  | Soil | 144  | 2 | SAMN12824518 | This study |
| MSHR10446 | <i>Burkholderia pseudomallei</i> | 2017 | Park  | Soil | 109  | 4 | SAMN12824519 | This study |
| MSHR10493 | <i>Burkholderia pseudomallei</i> | 2017 | Park  | Soil | 36   | 3 | SAMN12824520 | This study |
| MSHR10501 | <i>Burkholderia pseudomallei</i> | 2017 | Park  | Soil | 320  | 1 | SAMN12824521 | This study |
| MSHR10517 | <i>Burkholderia pseudomallei</i> | 2017 | Park  | Soil | 109  | 4 | SAMN12824522 | This study |
| MSHR10522 | <i>Burkholderia pseudomallei</i> | 2017 | Park  | Soil | 109  | 4 | SAMN12824523 | This study |
| MSHR10525 | <i>Burkholderia pseudomallei</i> | 2017 | Park  | Soil | 36   | 3 | SAMN12824524 | This study |
| MSHR10526 | <i>Burkholderia pseudomallei</i> | 2017 | Park  | Soil | 984  | 1 | SAMN12824525 | This study |
| MSHR10531 | <i>Burkholderia pseudomallei</i> | 2017 | Park  | Soil | 36   | 3 | SAMN12824526 | This study |
| MSHR10533 | <i>Burkholderia pseudomallei</i> | 2017 | Park  | Soil | 36   | 3 | SAMN12824527 | This study |
| MSHR10541 | <i>Burkholderia pseudomallei</i> | 2017 | Park  | Soil | 562  | 1 | SAMN12824528 | This study |
| MSHR10550 | <i>Burkholderia pseudomallei</i> | 2017 | Park  | Soil | 809  | 1 | SAMN12824529 | This study |
| MSHR10619 | <i>Burkholderia pseudomallei</i> | 2017 | Drain | Soil | 1704 | 1 | SAMN12824530 | This study |
| MSHR10622 | <i>Burkholderia pseudomallei</i> | 2017 | Drain | Soil | 466  | 1 | SAMN12824531 | This study |
| MSHR10628 | <i>Burkholderia pseudomallei</i> | 2017 | Drain | Soil | 109  | 4 | SAMN12824532 | This study |
| MSHR10635 | <i>Burkholderia pseudomallei</i> | 2017 | Drain | Soil | 1705 | 1 | SAMN12824533 | This study |
| MSHR10640 | <i>Burkholderia pseudomallei</i> | 2017 | Park  | Soil | 109  | 4 | SAMN12824534 | This study |
| MSHR10645 | <i>Burkholderia pseudomallei</i> | 2017 | Park  | Soil | 566  | 3 | SAMN12824535 | This study |

|           |                                  |      |       |      |     |   |              |            |
|-----------|----------------------------------|------|-------|------|-----|---|--------------|------------|
| MSHR10653 | <i>Burkholderia pseudomallei</i> | 2017 | Drain | Soil | 109 | 4 | SAMN12824536 | This study |
| MSHR10673 | <i>Burkholderia pseudomallei</i> | 2017 | Park  | Soil | 36  | 3 | SAMN12824537 | This study |
| MSHR10686 | <i>Burkholderia pseudomallei</i> | 2017 | Drain | Soil | 36  | 3 | SAMN12824538 | This study |
| MSHR10688 | <i>Burkholderia pseudomallei</i> | 2017 | Drain | Soil | 36  | 3 | SAMN12824539 | This study |
| MSHR10690 | <i>Burkholderia pseudomallei</i> | 2017 | Drain | Soil | 335 | 1 | SAMN12824540 | This study |
| MSHR10693 | <i>Burkholderia pseudomallei</i> | 2017 | Drain | Soil | 813 | 1 | SAMN12824541 | This study |
| MSHR10697 | <i>Burkholderia pseudomallei</i> | 2017 | Drain | Soil | 616 | 1 | SAMN12824542 | This study |
| MSHR10703 | <i>Burkholderia pseudomallei</i> | 2017 | Park  | Soil | 36  | 3 | SAMN12824543 | This study |
| MSHR10708 | <i>Burkholderia pseudomallei</i> | 2017 | Park  | Soil | 36  | 3 | SAMN12824544 | This study |
| MSHR10713 | <i>Burkholderia pseudomallei</i> | 2017 | Park  | Soil | 109 | 4 | SAMN12824545 | This study |
| MSHR10717 | <i>Burkholderia pseudomallei</i> | 2017 | Park  | Soil | 553 | 5 | SAMN12824546 | This study |
| MSHR10721 | <i>Burkholderia pseudomallei</i> | 2017 | Drain | Soil | 36  | 3 | SAMN12824547 | This study |
| MSHR10722 | <i>Burkholderia pseudomallei</i> | 2017 | Drain | Soil | 36  | 3 | SAMN12824548 | This study |
| MSHR10734 | <i>Burkholderia pseudomallei</i> | 2017 | Drain | Soil | 982 | 1 | SAMN12824549 | This study |
| MSHR10737 | <i>Burkholderia pseudomallei</i> | 2017 | Drain | Soil | 36  | 3 | SAMN12824550 | This study |
| MSHR10741 | <i>Burkholderia pseudomallei</i> | 2017 | Drain | Soil | 109 | 4 | SAMN12824551 | This study |
| MSHR10743 | <i>Burkholderia pseudomallei</i> | 2017 | Drain | Soil | 109 | 4 | SAMN12824552 | This study |
| MSHR10746 | <i>Burkholderia pseudomallei</i> | 2017 | Drain | Soil | 982 | 1 | SAMN12824553 | This study |
| MSHR10751 | <i>Burkholderia pseudomallei</i> | 2017 | Drain | Soil | 132 | 1 | SAMN12824554 | This study |
| MSHR10782 | <i>Burkholderia pseudomallei</i> | 2017 | Drain | Soil | 36  | 3 | SAMN12824555 | This study |
| MSHR10790 | <i>Burkholderia pseudomallei</i> | 2017 | Drain | Soil | 279 | 1 | SAMN12824556 | This study |
| MSHR10801 | <i>Burkholderia pseudomallei</i> | 2017 | Park  | Soil | 813 | 1 | SAMN12824557 | This study |
| MSHR10804 | <i>Burkholderia pseudomallei</i> | 2017 | Drain | Soil | 144 | 2 | SAMN12824558 | This study |
| MSHR10819 | <i>Burkholderia pseudomallei</i> | 2017 | Park  | Soil | 466 | 1 | SAMN12824559 | This study |
| MSHR10842 | <i>Burkholderia pseudomallei</i> | 2017 | Drain | Soil | 36  | 3 | SAMN12824560 | This study |
| MSHR10843 | <i>Burkholderia pseudomallei</i> | 2017 | Park  | Soil | 36  | 3 | SAMN12824561 | This study |
| MSHR10848 | <i>Burkholderia pseudomallei</i> | 2017 | Drain | Soil | 320 | 1 | SAMN12824562 | This study |
| MSHR10857 | <i>Burkholderia pseudomallei</i> | 2017 | Park  | Soil | 36  | 3 | SAMN12824563 | This study |

|           |                                  |      |       |      |      |   |              |            |
|-----------|----------------------------------|------|-------|------|------|---|--------------|------------|
| MSHR10860 | <i>Burkholderia pseudomallei</i> | 2017 | Drain | Soil | 109  | 4 | SAMN12824564 | This study |
| MSHR10880 | <i>Burkholderia pseudomallei</i> | 2017 | Park  | Soil | 36   | 3 | SAMN12824565 | This study |
| MSHR10888 | <i>Burkholderia pseudomallei</i> | 2017 | Drain | Soil | 326  | 2 | SAMN12824566 | This study |
| MSHR10901 | <i>Burkholderia pseudomallei</i> | 2017 | Park  | Soil | 464  | 1 | SAMN12824567 | This study |
| MSHR10904 | <i>Burkholderia pseudomallei</i> | 2017 | Park  | Soil | 36   | 3 | SAMN12824568 | This study |
| MSHR10924 | <i>Burkholderia pseudomallei</i> | 2017 | Drain | Soil | 553  | 5 | SAMN12824569 | This study |
| MSHR10941 | <i>Burkholderia pseudomallei</i> | 2017 | Park  | Soil | 279  | 1 | SAMN12824570 | This study |
| MSHR10945 | <i>Burkholderia pseudomallei</i> | 2017 | Park  | Soil | 327  | 2 | SAMN12824571 | This study |
| MSHR10962 | <i>Burkholderia pseudomallei</i> | 2017 | Park  | Soil | 109  | 4 | SAMN12824572 | This study |
| MSHR10967 | <i>Burkholderia pseudomallei</i> | 2017 | Park  | Soil | 36   | 3 | SAMN12824573 | This study |
| MSHR10978 | <i>Burkholderia pseudomallei</i> | 2017 | Park  | Soil | 566  | 3 | SAMN12824574 | This study |
| MSHR10988 | <i>Burkholderia pseudomallei</i> | 2017 | Park  | Soil | 327  | 2 | SAMN12824575 | This study |
| MSHR10995 | <i>Burkholderia pseudomallei</i> | 2017 | Park  | Soil | 327  | 2 | SAMN12824576 | This study |
| MSHR11009 | <i>Burkholderia pseudomallei</i> | 2017 | Park  | Soil | 801  | 1 | SAMN12824577 | This study |
| MSHR11017 | <i>Burkholderia pseudomallei</i> | 2017 | Park  | Soil | 144  | 2 | SAMN12824578 | This study |
| MSHR11035 | <i>Burkholderia pseudomallei</i> | 2017 | Park  | Soil | 36   | 3 | SAMN12824579 | This study |
| MSHR11042 | <i>Burkholderia pseudomallei</i> | 2017 | Park  | Soil | 279  | 1 | SAMN12824580 | This study |
| MSHR11046 | <i>Burkholderia pseudomallei</i> | 2017 | Park  | Soil | 553  | 5 | SAMN12824581 | This study |
| MSHR11051 | <i>Burkholderia pseudomallei</i> | 2017 | Park  | Soil | 327  | 2 | SAMN12824582 | This study |
| MSHR11056 | <i>Burkholderia pseudomallei</i> | 2017 | Park  | Soil | 36   | 3 | SAMN12824583 | This study |
| MSHR11059 | <i>Burkholderia pseudomallei</i> | 2017 | Park  | Soil | 36   | 3 | SAMN12824584 | This study |
| MSHR11062 | <i>Burkholderia pseudomallei</i> | 2017 | Park  | Soil | 36   | 3 | SAMN12824585 | This study |
| MSHR11068 | <i>Burkholderia pseudomallei</i> | 2017 | Park  | Soil | 553  | 5 | SAMN12824586 | This study |
| MSHR11073 | <i>Burkholderia pseudomallei</i> | 2017 | Park  | Soil | 36   | 3 | SAMN12824587 | This study |
| MSHR11089 | <i>Burkholderia pseudomallei</i> | 2017 | Drain | Soil | 36   | 3 | SAMN12824588 | This study |
| MSHR11092 | <i>Burkholderia pseudomallei</i> | 2017 | Park  | Soil | 1660 | 3 | SAMN12824589 | This study |
| MSHR11100 | <i>Burkholderia pseudomallei</i> | 2017 | Park  | Soil | 36   | 3 | SAMN12824590 | This study |
| MSHR11105 | <i>Burkholderia pseudomallei</i> | 2017 | Park  | Soil | 327  | 2 | SAMN12824591 | This study |

|           |                                  |      |       |      |      |   |              |            |
|-----------|----------------------------------|------|-------|------|------|---|--------------|------------|
| MSHR11148 | <i>Burkholderia pseudomallei</i> | 2017 | Park  | Soil | 36   | 3 | SAMN12824592 | This study |
| MSHR11151 | <i>Burkholderia pseudomallei</i> | 2017 | Park  | Soil | 327  | 2 | SAMN12824593 | This study |
| MSHR11184 | <i>Burkholderia pseudomallei</i> | 2017 | Park  | Soil | 36   | 3 | SAMN12824594 | This study |
| MSHR11190 | <i>Burkholderia pseudomallei</i> | 2017 | Park  | Soil | 553  | 5 | SAMN12824595 | This study |
| MSHR11194 | <i>Burkholderia pseudomallei</i> | 2017 | Drain | Soil | 801  | 1 | SAMN12824596 | This study |
| MSHR11196 | <i>Burkholderia pseudomallei</i> | 2017 | Drain | Soil | 36   | 3 | SAMN12824597 | This study |
| MSHR11199 | <i>Burkholderia pseudomallei</i> | 2017 | Drain | Soil | 327  | 2 | SAMN12824598 | This study |
| MSHR11206 | <i>Burkholderia pseudomallei</i> | 2017 | Park  | Soil | 36   | 3 | SAMN12824599 | This study |
| MSHR11210 | <i>Burkholderia pseudomallei</i> | 2017 | Park  | Soil | 36   | 3 | SAMN12824600 | This study |
| MSHR11213 | <i>Burkholderia pseudomallei</i> | 2017 | Park  | Soil | 36   | 3 | SAMN12824601 | This study |
| MSHR11225 | <i>Burkholderia pseudomallei</i> | 2017 | Park  | Soil | 109  | 4 | SAMN12824602 | This study |
| MSHR11254 | <i>Burkholderia pseudomallei</i> | 2017 | Drain | Soil | 36   | 3 | SAMN12824603 | This study |
| MSHR11255 | <i>Burkholderia pseudomallei</i> | 2017 | Drain | Soil | 1659 | 3 | SAMN12824604 | This study |
| MSHR11259 | <i>Burkholderia pseudomallei</i> | 2017 | Drain | Soil | 462  | 1 | SAMN12824605 | This study |
| MSHR11266 | <i>Burkholderia pseudomallei</i> | 2017 | Drain | Soil | 1655 | 1 | SAMN12824606 | This study |
| MSHR11267 | <i>Burkholderia pseudomallei</i> | 2017 | Park  | Soil | 639  | 1 | SAMN12824607 | This study |
| MSHR11270 | <i>Burkholderia pseudomallei</i> | 2017 | Park  | Soil | 109  | 4 | SAMN12824608 | This study |
| MSHR11277 | <i>Burkholderia pseudomallei</i> | 2017 | Drain | Soil | 462  | 1 | SAMN12824609 | This study |
| MSHR11283 | <i>Burkholderia pseudomallei</i> | 2017 | Drain | Soil | 553  | 5 | SAMN12824610 | This study |
| MSHR11290 | <i>Burkholderia pseudomallei</i> | 2017 | Drain | Soil | 561  | 1 | SAMN12824611 | This study |
| MSHR11322 | <i>Burkholderia pseudomallei</i> | 2017 | Drain | Soil | 553  | 5 | SAMN12824612 | This study |
| MSHR11327 | <i>Burkholderia pseudomallei</i> | 2017 | Drain | Soil | 320  | 1 | SAMN12824613 | This study |
| MSHR11331 | <i>Burkholderia pseudomallei</i> | 2017 | Drain | Soil | 36   | 3 | SAMN12824614 | This study |
| MSHR11335 | <i>Burkholderia pseudomallei</i> | 2017 | Park  | Soil | 1658 | 1 | SAMN12824615 | This study |
| MSHR11348 | <i>Burkholderia pseudomallei</i> | 2017 | Park  | Soil | 36   | 3 | SAMN12824616 | This study |
| MSHR11351 | <i>Burkholderia pseudomallei</i> | 2017 | Park  | Soil | 109  | 4 | SAMN12824617 | This study |
| MSHR11354 | <i>Burkholderia pseudomallei</i> | 2017 | Drain | Soil | 327  | 2 | SAMN12824618 | This study |
| MSHR11369 | <i>Burkholderia pseudomallei</i> | 2017 | Park  | Soil | 36   | 3 | SAMN12824619 | This study |

|           |                                  |      |      |      |     |   |              |            |
|-----------|----------------------------------|------|------|------|-----|---|--------------|------------|
| MSHR11384 | <i>Burkholderia pseudomallei</i> | 2017 | Park | Soil | 362 | 2 | SAMN12824620 | This study |
| MSHR12106 | <i>Burkholderia pseudomallei</i> | 2017 | Park | Soil | 562 | 1 | SAMN12824621 | This study |





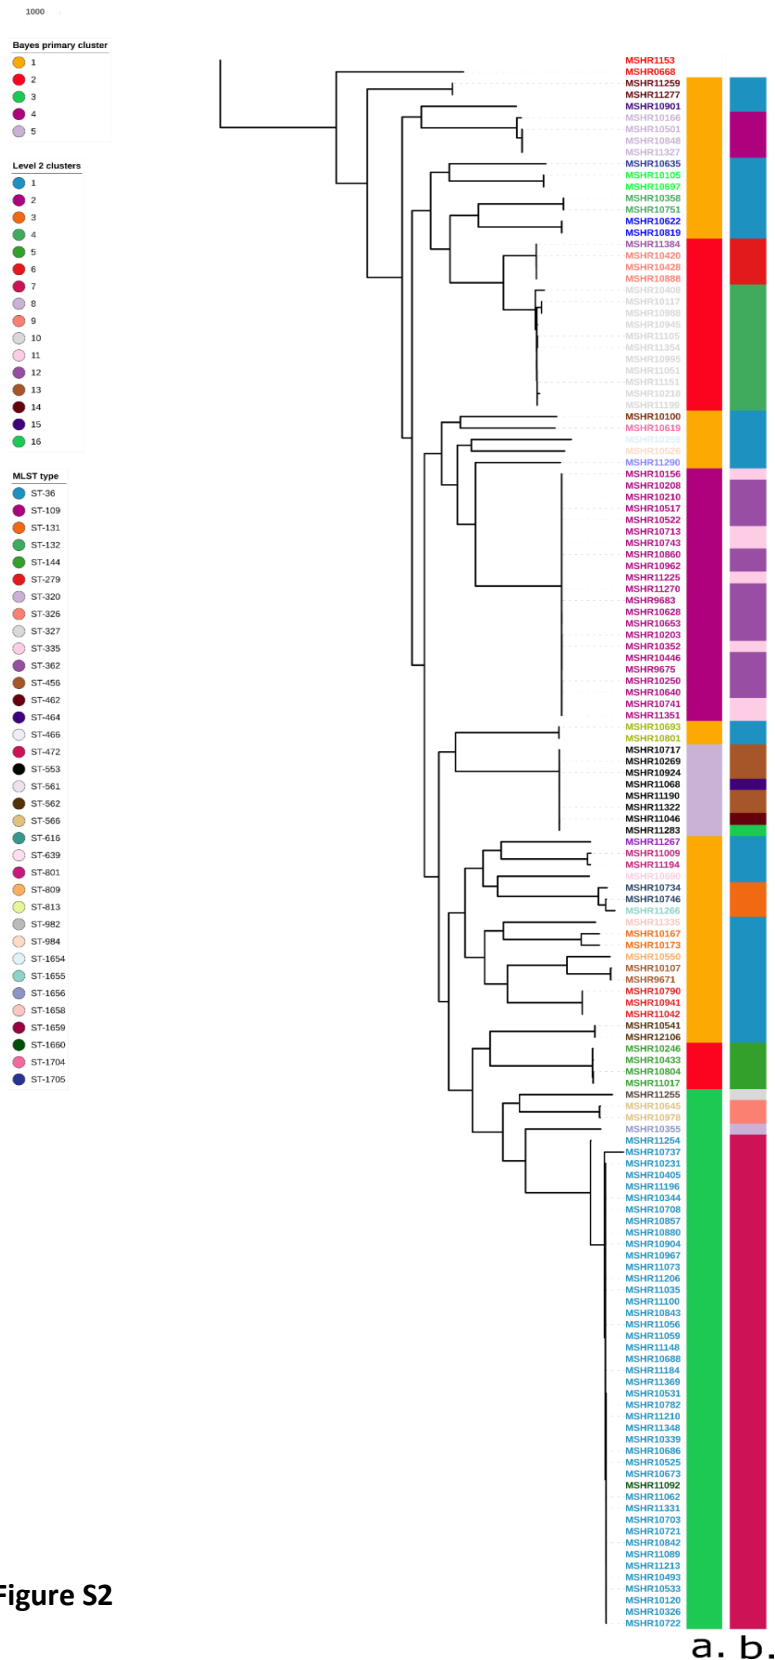

Supplementary Figure S2

Maximum parsimony phylogeny of 137 *B. pseudomallei* genomes constructed using 134,032 core-genome orthologous SNPs and InDels. BAPS level 1 primary clusters (a.) and level 2 clusters (b.) were inferred using RhierBAPS and are colour-coded next to respective strains.

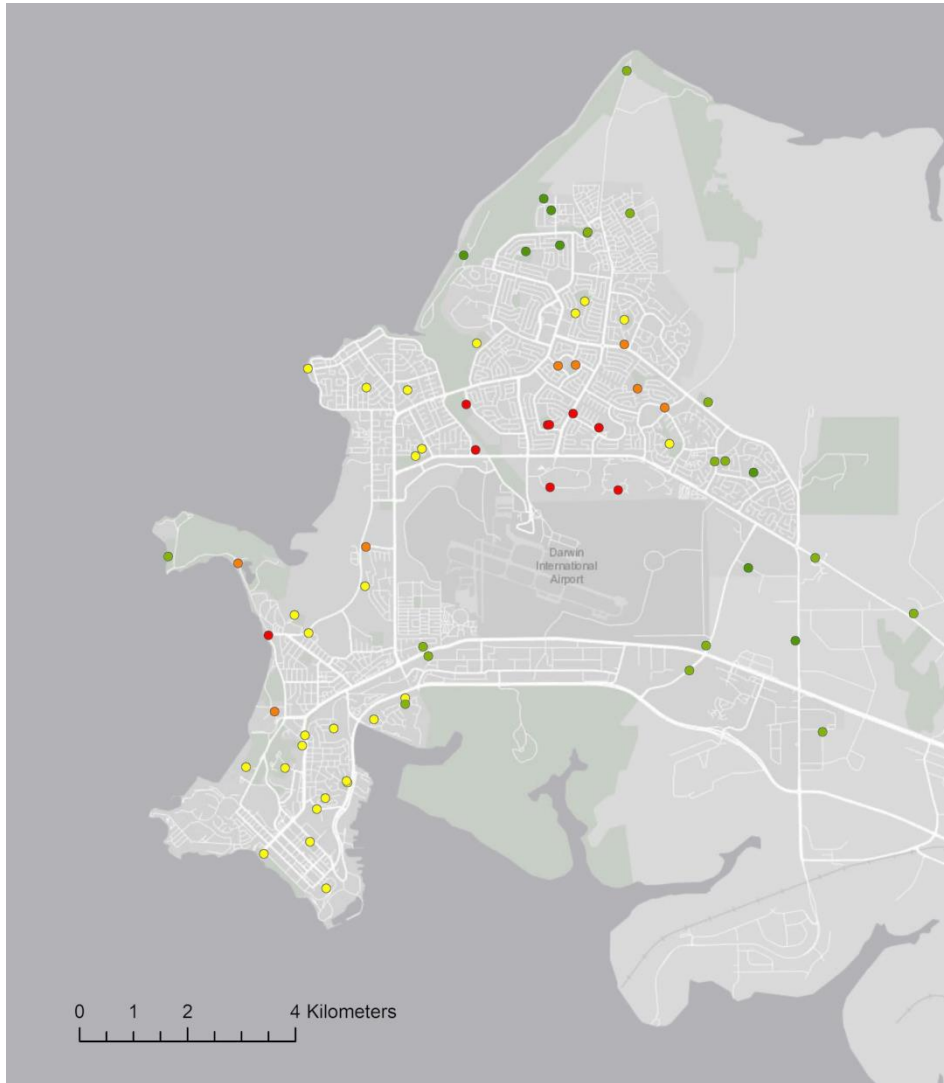

**Supplementary Figure S3-** Getis-Ord  $G_i^*$  Hot Spot Analysis of Bayes cluster 3. Areas with significant “hot” spots are indicated by dark red circles while “cold” spots are shown in green (ArcGIS v.10.4.1 (ESRI)).
